# Supplementary material
Source: PubMed Central journal article supplement (PMC7432302)
Supplement: jamapediatr-e202271-s003.pdf [file jamapediatr-e202271-s003.pdf]

## Data Sharing Statement

Juul. Effect of High-Dose Erythropoietin on Blood Transfusions in Extremely Low Gestational Age Neonates. *JAMA Pediatr.* Published August 17, 2020. 10.1001/jamapediatrics.2020.2271

### Data

**Data available:** Yes

**Data types:** Deidentified participant data, Data dictionary

**How to access data:** NINDS

**When available:** beginning date: 01-01-2021

### Supporting Documents

**Document types:** None

### Additional Information

**Who can access the data:** researchers whose proposed use of the data has been approved

**Types of analyses:** analyses for clinically applicable questions regarding preterm infants

**Mechanisms of data availability:** after approval of a proposal,
